# Supplementary material for: Revisiting the ‘direct mineral cycling’ hypothesis: arbuscular mycorrhizal fungi colonize leaf litter, but why?
Source: PubMed Central journal article supplement (PMC6775977; doi:10.1038/s41396-019-0403-2), 2019-03-25
Supplement: 41396_2019_403_MOESM2_ESM.pdf [file 41396_2019_403_MOESM2_ESM.pdf]

Table S1. Study sites were located in two mixed maritime forests in the early stages of succession. These two forests, which we called Forest 1 and Forest 2, are approximately 9 km apart and are located near Bellingham, Washington, USA. Altitude and soil organic matter content of the studied forests are presented as means  $\pm$  standard errors. Study sites 1 through 4 were located in Forest 1, while 5 through 8 were located in Forest 2.

| Location ID | n | Altitude (m) | Organic matter (%) | Study Sites     |
|-------------|---|--------------|--------------------|-----------------|
| Forest 1    | 4 | 174          | 14.4 $\pm$ 3.8     | 1- 4, composite |
| Forest 2    | 4 | 471          | 24.5 $\pm$ 5.0     | 5 - 8           |

Table S3. Arbuscular mycorrhizal fungal taxa found in litter, soil, or both litter and soil after resampling to 114 sequences/sample.

| Where found                  | Virtual taxa | Genus                  |
|------------------------------|--------------|------------------------|
| Only in leaf litter          | VTX00067     | <i>Glomus</i>          |
|                              | VTX00108     | <i>Glomus</i>          |
|                              | VTX00113     | <i>Glomus</i>          |
|                              | VTX00115     | <i>Glomus</i>          |
|                              | VTX00143     | <i>Glomus</i>          |
|                              | VTX00165     | <i>Glomus</i>          |
|                              | VTX00197     | <i>Glomus</i>          |
|                              | VTX00159     | <i>Glomus</i>          |
|                              | VTX00239     | <i>Paraglomus</i>      |
| In both leaf litter and soil | VTX00004     | <i>Archaeospora</i>    |
|                              | VTX00057     | <i>Claroideoglomus</i> |
|                              | VTX00225     | <i>Claroideoglomus</i> |
|                              | VTX00357     | <i>Claroideoglomus</i> |
|                              | VTX00160     | <i>Glomus</i>          |
|                              | VTX00281     | <i>Paraglomus</i>      |
|                              | VTX00308     | <i>Paraglomus</i>      |
| Only in soil                 | VTX00030     | <i>Acaulospora</i>     |
|                              | VTX00056     | <i>Claroideoglomus</i> |
|                              | VTX00193     | <i>Claroideoglomus</i> |
|                              | VTX00340     | <i>Claroideoglomus</i> |
|                              | VTX00061     | <i>Diversispora</i>    |
|                              | VTX00062     | <i>Diversispora</i>    |
|                              | VTX00072     | <i>Glomus</i>          |
|                              | VTX00074     | <i>Glomus</i>          |
|                              | VTX00084     | <i>Glomus</i>          |
|                              | VTX00088     | <i>Glomus</i>          |
|                              | VTX00122     | <i>Glomus</i>          |
|                              | VTX00129     | <i>Glomus</i>          |
|                              | VTX00153     | <i>Glomus</i>          |
|                              | VTX00199     | <i>Glomus</i>          |
|                              | VTX00214     | <i>Glomus</i>          |
|                              | VTX00216     | <i>Glomus</i>          |
|                              | VTX00219     | <i>Glomus</i>          |

Table S4. Results of a permutational multivariate analysis of variance of AM fungal communities considering two factors, site and source of mycorrhizal community (*i.e.* soil or litter). This analysis used the same data that are displayed in Fig. 1c. Note that the factor 'site' included a separate category for composite samples.

| Source      | df | SS    | R <sup>2</sup> | F    | p     |
|-------------|----|-------|----------------|------|-------|
| site        | 8  | 39418 | 0.698          | 2.86 | 0.006 |
| soil/litter | 1  | 10127 | 0.179          | 5.88 | 0.004 |
| residual    | 4  | 6891  | 0.122          |      |       |
| Total       | 13 | 56436 |                |      |       |
